# Supplementary material
Source: PubMed Central journal article supplement (PMC3985765)
Supplement: bi4015049_si_001.pdf [file bi4015049_si_001.pdf]

## Molecular recognition of fluorine impacts substrate selectivity in the fluoroacetyl-CoA thioesterase FIK

Amy M. Weeks, Neil S. Keddie, Rudy D.P. Wadoux, David O'Hagan, and Michelle C.Y. Chang\*

### Supplementary Figures

|                                                                                                                          |    |
|--------------------------------------------------------------------------------------------------------------------------|----|
| <b>Table S1.</b> Acyl-CoA numbering scheme for 1D NMRs and $^1\text{H}/^{13}\text{C}$ HMBC crosspeaks                    | S2 |
| <b>Figure S1.</b> $^1\text{H}/^{13}\text{C}$ HMBC spectrum of (S)-2-fluoropropionyl-CoA in $\text{D}_2\text{O}$ .        | S3 |
| <b>Figure S2.</b> $^1\text{H}/^{13}\text{C}$ HMBC spectrum of (R)-2-fluoropropionyl-CoA in $\text{D}_2\text{O}$ .        | S4 |
| <b>Figure S3.</b> The catalytic triad of FIK-T42S                                                                        | S5 |
| <b>Figure S4.</b> Simulated steady-state kinetic data for FIK-T42S-catalyzed acetyl-CoA hydrolysis                       | S6 |
| <b>Figure S5.</b> Time courses for hydrolysis of (RS)-2-fluoropropionyl-CoA.                                             | S7 |
| <b>Figure S6.</b> Taft plot for $k_{\text{cat}}$ of various acyl-CoA FIK substrates                                      | S8 |
| <b>Figure S7.</b> Simulated steady-state kinetic data for FIK-catalyzed hydrolysis of (S)- and (R)-2-fluoropropionyl-CoA | S8 |

### Literature Cited

S9

## Supplementary Figures

Table S1. Acyl-CoA numbering scheme for 1D NMRs and  $^1\text{H}/^{13}\text{C}$  HMBC crosspeaks.

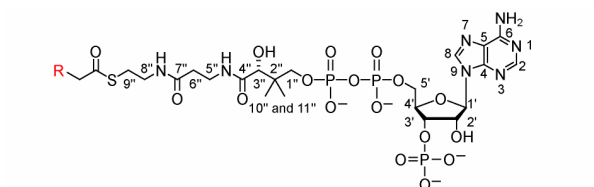

| <i>Crosspeak numbering for HMBC spectra</i> |                                 |    |                                  |    |                                                |    |                           |
|---------------------------------------------|---------------------------------|----|----------------------------------|----|------------------------------------------------|----|---------------------------|
| 1                                           | $\text{H}_{1''}\text{C}_{2''}$  | 10 | $\text{H}_{10''}\text{C}_{11''}$ | 19 | $\text{H}_{5''}\text{C}_{7''}$                 | 28 | $\text{H}_2\text{C}_4$    |
| 2                                           | $\text{H}_{1''}\text{C}_{3''}$  | 11 | $\text{H}_{10''}\text{C}_{2''}$  | 20 | $\text{H}_{5''}\text{C}_{6''}$                 | 29 | $\text{H}_2\text{C}_6$    |
| 3                                           | $\text{H}_{1''}\text{C}_{11''}$ | 12 | $\text{H}_{10''}\text{C}_{1''}$  | 21 | $\text{H}_{6''}\text{C}_{7''}$                 | 30 | $\text{H}_8\text{C}_4$    |
| 4                                           | $\text{H}_{1''}\text{C}_{10''}$ | 13 | $\text{H}_{10''}\text{C}_{3''}$  | 22 | $\text{H}_{6''}\text{C}_{5''}$                 | 31 | $\text{H}_8\text{C}_5$    |
| 5                                           | $\text{H}_3''\text{C}_{11''}$   | 14 | $\text{H}_{11''}\text{C}_{10''}$ | 23 | $\text{H}_{6''}\text{C}_{7''}$                 | 32 | $\text{H}_1\text{C}_2$    |
| 6                                           | $\text{H}_3''\text{C}_{10''}$   | 15 | $\text{H}_{11''}\text{C}_{2''}$  | 24 | $\text{H}_{8''}\text{C}_{9''}$                 | 33 | $\text{H}_1\text{C}_4$    |
| 7                                           | $\text{H}_3''\text{C}_{2''}$    | 16 | $\text{H}_{11''}\text{C}_{1''}$  | 25 | $\text{H}_{9''}\text{C}_{1\text{RAC}}$         | 34 | $\text{H}_1\text{C}_{4'}$ |
| 8                                           | $\text{H}_3''\text{C}_{1''}$    | 17 | $\text{H}_{11''}\text{C}_{3''}$  | 26 | $\text{H}_{9''}\text{C}_{8''}$                 | 35 | $\text{H}_2\text{C}_{1'}$ |
| 9                                           | $\text{H}_3''\text{C}_{4''}$    | 18 | $\text{H}_5''\text{C}_{4''}$     | 27 | $\text{H}_{2\text{RAC}}\text{C}_{1\text{RAC}}$ | 36 | $\text{H}_3\text{C}_{4'}$ |

Figure S1.  $^1\text{H}/^{13}\text{C}$  HMBC spectrum of (S)-2-fluoropropionyl-CoA in  $\text{D}_2\text{O}$ .

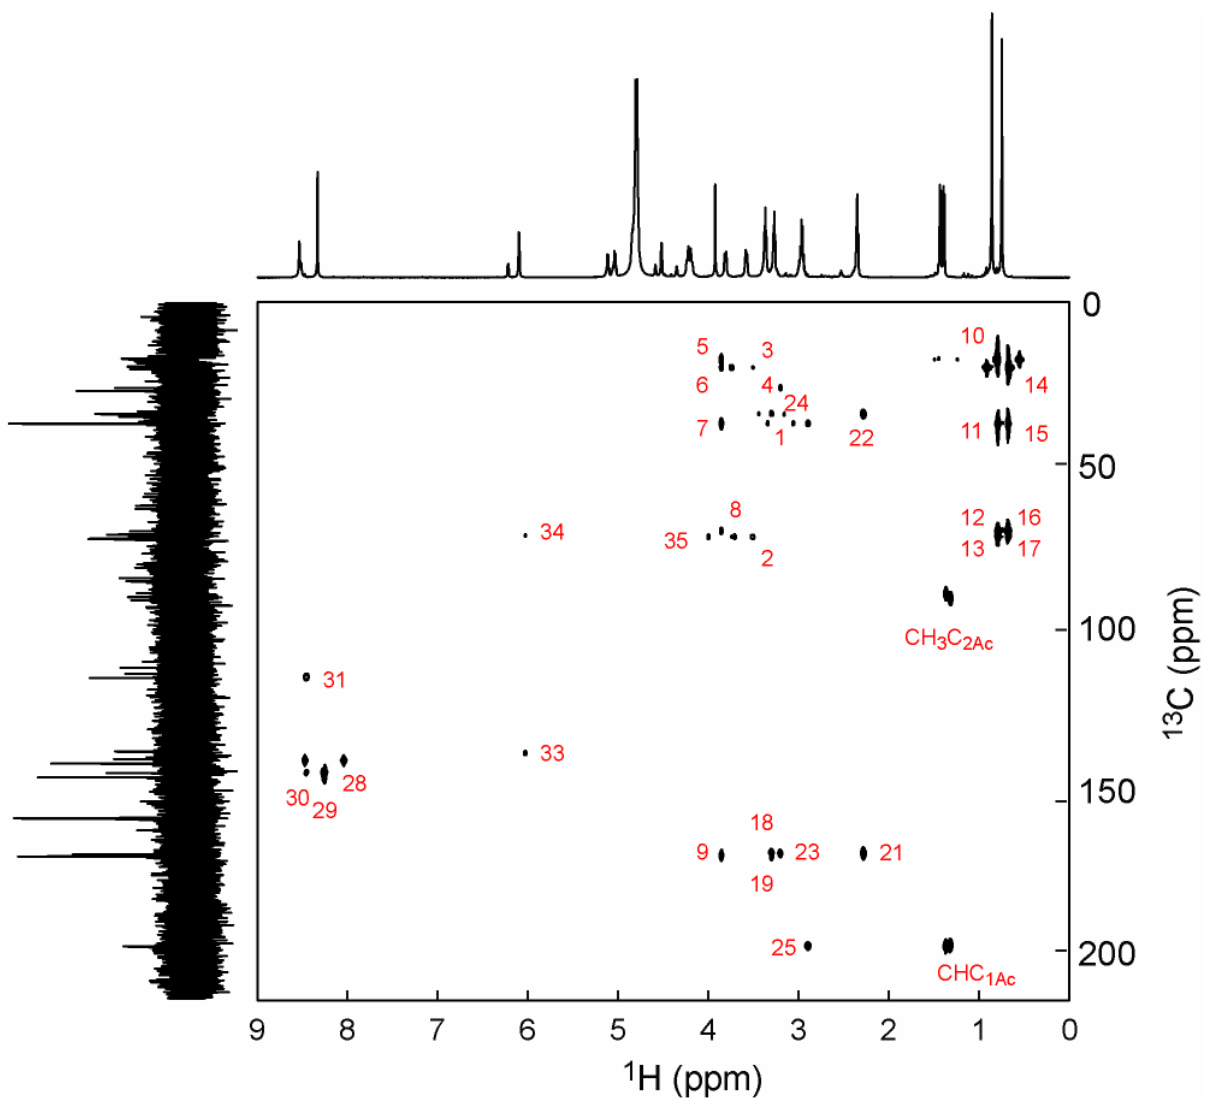

Figure S2.  $^1\text{H}/^{13}\text{C}$  HMBC spectrum of (*R*)-2-fluoropropionyl-CoA in  $\text{D}_2\text{O}$ .

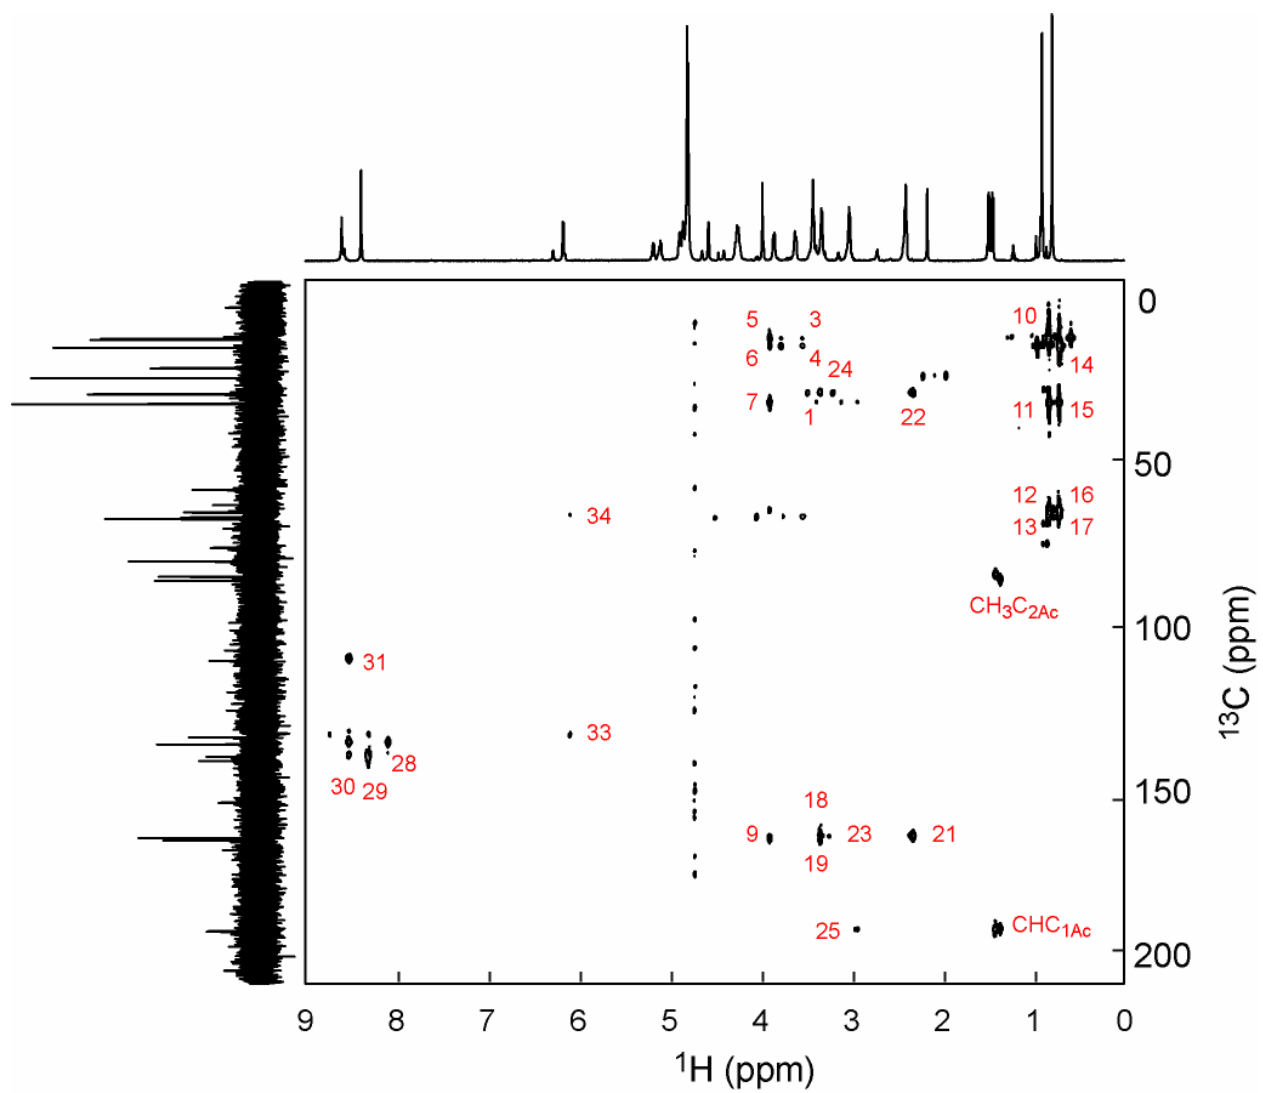

**Figure S3. The catalytic triad of FIK-T42S.** In the FIK-T42S mutant (PDB ID: 3KVU), both Ser 42 and His 76 populate two different rotatmers, and Glu 50 is rotated relative to its position in the wild-type enzyme (*I*). Chain A, grey; chain B, slate; carbon, grey; nitrogen, blue; oxygen red.

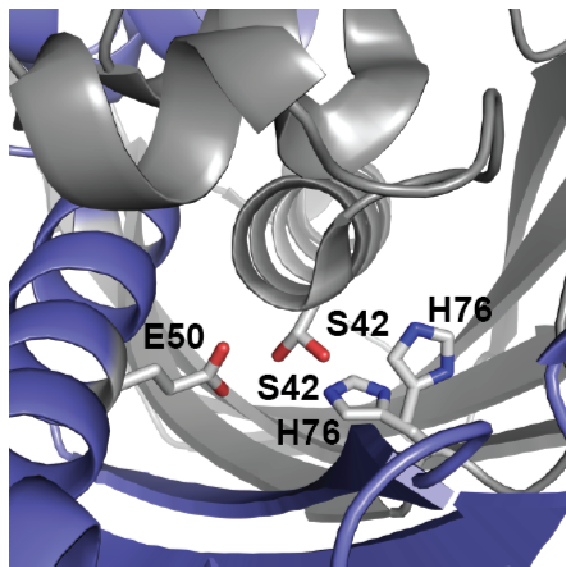

**Figure S4. Simulated steady-state kinetic data for FIK-T42S-catalyzed acetyl-CoA hydrolysis.** Data were simulated using the same  $K_D$  for both wild-type and mutant and using the acylation and deacylation rate constants measured using pre-steady-state kinetic analysis.

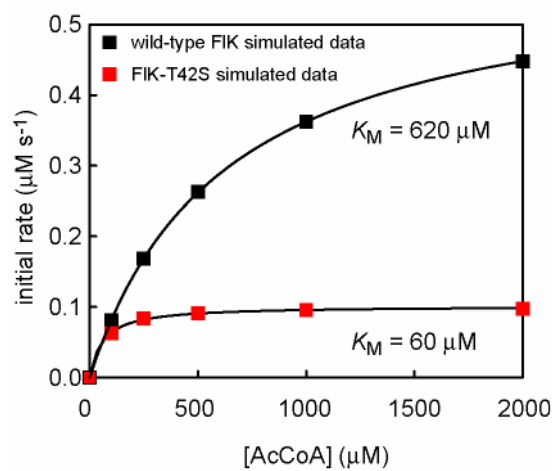

**Figure S5. Time courses for hydrolysis of (*R*,*S*)-2-fluoropropionyl-CoA. (A) 50  $\mu$ M. (B) 100  $\mu$ M. (C) 200  $\mu$ M. (D) 250  $\mu$ M.**

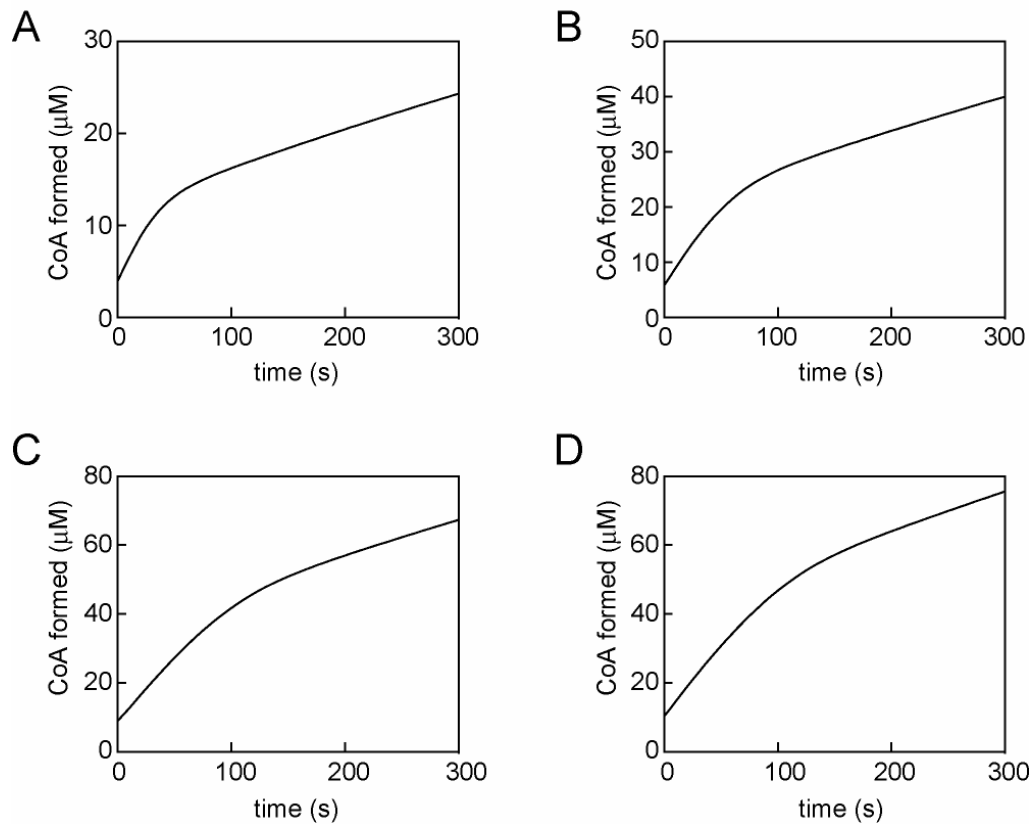

**Figure S6. Taft plot for  $k_{\text{cat}}$  of various acyl-CoA FIK substrates.** 2-fluoropropionyl-CoA substrates are shown in red. Data shown in black are from (2).  $\sigma^*$  values for acyl-CoAs with a single  $\alpha$ -substituent are from (3). The  $\sigma^*$  value for 2-fluoropropionyl-CoA was calculated by adding the values for the F and Me substituents as described in (4). Et, butyryl-CoA; Me, propionyl-CoA; H, acetyl-CoA; Br, bromoacetyl-CoA; Cl, chloroacetyl-CoA; F, fluoroacetyl-CoA; (S)-F, Me, (S)-2-fluoropropionyl-CoA; (R)-F, Me, (R)-2-fluoropropionyl-CoA; CN, cyanoacetyl-CoA.

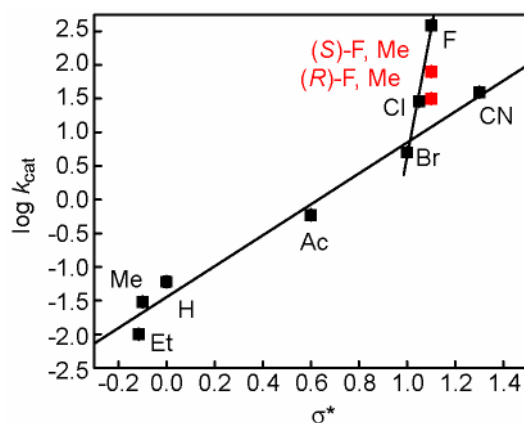

**Figure S7. Simulated steady-state kinetic data for FIK-catalyzed hydrolysis of (S)- and (R)-2-fluoropropionyl-CoA.** At constant  $K_D$ , the changes in the measured kinetic constants are sufficient to explain the difference in  $K_M$  between the two substrates.

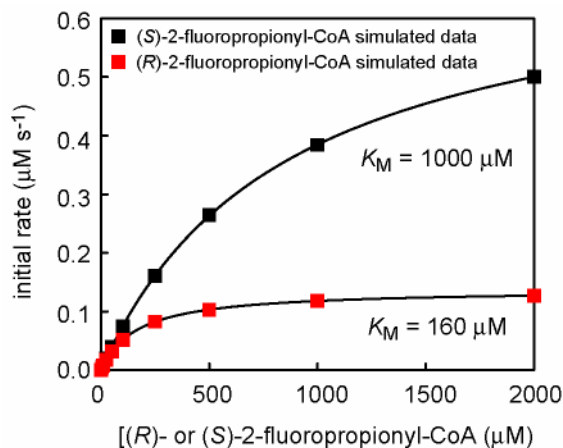



## Literature cited

1. Dias, M. V., Huang, F., Chirgadze, D. Y., Tosin, M., Spiteller, D., Dry, E. F., Leadlay, P. F., Spencer, J. B., and Blundell, T. L. (2010) Structural basis for the activity and substrate specificity of fluoroacetyl-CoA thioesterase FIK, *J. Biol. Chem.* **285**, 22495-22504.
2. Weeks, A. M., and Chang, M. C. (2012) Catalytic control of enzymatic fluorine specificity, *Proc. Natl. Acad. Sci. U. S. A.* **109**, 19667-19672.
3. Taft, R. W., Jr. (1952) Polar and steric substituent constants for aliphatic and *o*-benzoate groups from rates of esterification and hydrolysis of esters, *J. Am. Chem. Soc.* **74**, 3120-3128.
4. Bowden, K., Chapman, N. B., and Shorter, J. (1963) The separation of polar and steric effects. Part III. The kinetics of the reactions of arylaliphatic carboxylic acids with diazodiphenylmethane, and of the acid-catalysed esterification of the acids in methanol, *J. Chem. Soc.* 1963, 5239-5247.
